# Supplementary material for: Allelic Differences Between Han Chinese and Europeans for Functional Variants in ZNF804A and Their Association With Schizophrenia
Source: Atypon-hosted journal article supplement (doi:10.1176/appi.ajp.2011.11030381), 2011-09-03
Supplement: appi.ajp.2011.11030381.ds001.pdf [file appi.ajp.2011.11030381.ds001.pdf]

## Supplemental Information

**Table S1. Genotype counts and p-values of the tested SNPs in our samples.**

| Sample                     | SNP ID     | Position  | Genotype | Genotype Counts |             | p-value<br>(nominal)              | p-value<br>(corrected)            |
|----------------------------|------------|-----------|----------|-----------------|-------------|-----------------------------------|-----------------------------------|
|                            |            |           |          | Cases           | Controls    |                                   |                                   |
| <b>Yuxi<br/>sample</b>     | rs1021042  | 185453158 | GG/GC/CC | 33/207/245      | 26/259/409  | <b><u>4.0×10<sup>-3</sup></u></b> | <b><u>0.020</u></b>               |
|                            | rs11888068 | 185460295 | TT/GT/GG | 84/256/150      | 156/334/204 | <b>0.080</b>                      | <b>0.20</b>                       |
|                            | rs13026173 | 185460842 | CC/GC/GG | 32/214/250      | 29/266/399  | <b>0.030</b>                      | <b>0.090</b>                      |
|                            | rs10497655 | 185462041 | CC/CT/TT | 109/250/134     | 172/331/191 | <b>0.49</b>                       | <b>0.94</b>                       |
|                            | rs359895   | 185463185 | AA/AT/TT | 12/133/354      | 34/237/423  | <b><u>7.0×10<sup>-4</sup></u></b> | <b><u>2.0×10<sup>-3</sup></u></b> |
|                            | rs1344706  | 185778428 | GG/GT/TT | 119/244/125     | 173/344/177 | <b>0.98</b>                       | <b>1.0</b>                        |
| <b>Kunming<br/>sample</b>  | rs1021042  | 185453158 | GG/GC/CC | 35/175/163      | 29/234/311  | <b><u>1.0×10<sup>-3</sup></u></b> | <b><u>3.0×10<sup>-3</sup></u></b> |
|                            | rs359895   | 185463185 | AA/AT/TT | 13/112/275      | 24/219/364  | <b><u>0.020</u></b>               | <b><u>0.030</u></b>               |
|                            | rs1344706  | 185778428 | GG/GT/TT | 88/227/88       | 137/311/156 | <b>0.26</b>                       | <b>0.60</b>                       |
| <b>Combined<br/>sample</b> | rs1021042  | 185453158 | GG/GC/CC | 68/382/408      | 55/493/720  | <b><u>7.7×10<sup>-6</sup></u></b> | <b><u>1.8×10<sup>-5</sup></u></b> |
|                            | rs359895   | 185463185 | AA/AT/TT | 25/245/629      | 58/456/787  | <b><u>2.1×10<sup>-5</sup></u></b> | <b><u>2.7×10<sup>-5</sup></u></b> |
|                            | rs1344706  | 185778428 | GG/GT/TT | 207/471/213     | 310/655/333 | <b>0.51</b>                       | <b>0.91</b>                       |

**Note:**

Significant p-values ( $p < 0.05$ ) were marked in bold and underlined.

**Table S2. The result of meta-analyses for rs1344706 in Han Chinese samples**

| samples( <i>N</i> cases/ <i>N</i> controls)     | T-allele frequency in |         | p-value | OR        | 95%CI |
|-------------------------------------------------|-----------------------|---------|---------|-----------|-------|
|                                                 | Controls              |         |         |           |       |
| O'Donovan <i>et al.</i> (996/1015) <sup>1</sup> | 0.514                 | 0.166   | 1.06    | 0.94-1.20 |       |
| Steinberg <i>et al.</i> (439/446) <sup>2</sup>  | 0.546                 | 0.62    | 0.95    | 0.79-1.15 |       |
| Zhang <i>et al.</i> (566/574) <sup>3</sup>      | 0.457                 | 0.00083 | 1.32    | 1.12-1.56 |       |
| Yuxi sample(488/694)*                           | 0.503                 | 0.876   | 1.01    | 0.86-1.19 |       |
| Kunming sample(403/604)*                        | 0.516                 | 0.489   | 0.94    | 0.79-1.12 |       |
| All samples(2892/3333)                          | 0.507                 | 0.38    | 1.05    | 0.94-1.18 |       |

**Abbreviations:** OR, odds ratio; CI, confidence interval.

Test of heterogeneity:  $\chi^2=10.43$ , *df*= 4, *p*-value=0.03.

The result for the combined samples (*p*=0.38, *Z*=0.88) was assessed using the Mantel-Haenszel method with the random-effects model.

\*Association of rs1344706 with schizophrenia in Yuxi and Kunming sample were genotyped in this study.

**Table S3. The result of meta-analyses for rs1344706 in Han Chinese samples when excluding the samples used in Zhang *et al.***

| samples( <i>N</i> cases/ <i>N</i> controls)     | T-allele frequency in |  | p-value | OR   | 95%CI     |
|-------------------------------------------------|-----------------------|--|---------|------|-----------|
|                                                 | Controls              |  |         |      |           |
| O'Donovan <i>et al.</i> (996/1015) <sup>1</sup> | 0.514                 |  | 0.166   | 1.06 | 0.94-1.20 |
| Steinberg <i>et al.</i> (439/446) <sup>2</sup>  | 0.546                 |  | 0.62    | 0.95 | 0.79-1.15 |
| Yuxi sample(488/694)*                           | 0.503                 |  | 0.876   | 1.01 | 0.86-1.19 |
| Kunming sample(403/604)*                        | 0.516                 |  | 0.489   | 0.94 | 0.79-1.12 |
| All samples(2326/2759)                          | 0.517                 |  | 0.87    | 1.01 | 0.93-1.09 |

**Abbreviations:** OR, odds ratio; CI, confidence interval.

Test of heterogeneity:  $\chi^2=1.72$ , df= 3, p-value=0.63.

The result for the combined samples (p=0.87, Z=0.16) was assessed using the Mantel-Haenszel method with the fixed-effects model.

\*Association of rs1344706 with schizophrenia in Yuxi and Kunming sample were genotyped in this study.

**Table S4. The list of 24 randomly selected SNPs for population stratification analysis**

| SNP        | Chromosome | SNP       | Chromosome |
|------------|------------|-----------|------------|
| rs5177     | 1          | rs4688043 | 3          |
| rs2297660  | 1          | rs3828611 | 5          |
| rs2297657  | 1          | rs4704591 | 5          |
| rs1344706  | 2          | rs362719  | 7          |
| rs1021042  | 2          | rs6951875 | 7          |
| rs359895   | 2          | rs2247776 | 7          |
| rs7597593  | 2          | rs7341475 | 7          |
| rs3971790  | 2          | rs727709  | 7          |
| rs3755557  | 3          | rs885995  | 7          |
| rs6782799  | 3          | rs2874941 | 8          |
| rs7431209  | 3          | rs2073665 | 8          |
| rs16830594 | 3          | rs1569198 | 10         |

## References:

1. O'Donovan MC, Craddock N, Norton N, Williams H, Peirce T, Moskvina V, Nikolov I, Hamshere M, Carroll L, Georgieva L, Dwyer S, Holmans P, Marchini JL, Spencer CC, Howie B, Leung HT, Hartmann AM, Moller HJ, Morris DW, Shi Y, Feng G, Hoffmann P, Propping P, Vasilescu C, Maier W, Rietschel M, Zammit S, Schumacher J, Quinn EM, Schulze TG, Williams NM, Giegling I, Iwata N, Ikeda M, Darvasi A, Shifman S, He L, Duan J, Sanders AR, Levinson DF, Gejman PV, Cichon S, Nothen MM, Gill M, Corvin A, Rujescu D, Kirov G, Owen MJ, Buccola NG, Mowry BJ, Freedman R, Amin F, Black DW, Silverman JM, Byerley WF, Cloninger CR: Identification of loci associated with schizophrenia by genome-wide association and follow-up. *Nat Genet* 2008; 40:1053-1055
2. Steinberg S, Mors O, Borglum AD, Gustafsson O, Werge T, Mortensen PB, Andreassen OA, Sigurdsson E, Thorgeirsson TE, Bottcher Y, Olason P, Ophoff RA, Cichon S, Gudjonsdottir IH, Pietilainen OP, Nyegaard M, Tuulio-Henriksson A, Ingason A, Hansen T, Athanasiu L, Suvisaari J, Lonnqvist J, Paunio T, Hartmann A, Jurgens G, Nordentoft M, Hougaard D, Norgaard-Pedersen B, Breuer R, Moller HJ, Giegling I, Glenthøj B, Rasmussen HB, Mattheisen M, Bitter I, Rethelyi JM, Sigmundsson T, Fossdal R, Thorsteinsdottir U, Ruggeri M, Tosato S, Strengman E, Kiemenev LA, Melle I, Djurovic S, Abramova L, Kaleda V, Walshe M, Bramon E, Vassos E, Li T, Fraser G, Walker N, Touloupoulou T, Yoon J, Freimer NB, Cantor RM, Murray R, Kong A, Golimbet V, Jonsson EG, Terenius L, Agartz I, Petursson H, Nothen MM, Rietschel M, Peltonen L, Rujescu D, Collier DA, Stefansson H, St Clair D, Stefansson K: Expanding the range of ZNF804A variants conferring risk of psychosis. *Mol Psychiatry* 2011; 16:59-66
3. Zhang R, Lu SM, Qiu C, Liu XG, Gao CG, Guo TW, Valenzuela RK, Deng HW, Ma J: Population-based and family-based association studies of ZNF804A locus and schizophrenia. *Mol Psychiatry* 2011; 16:360-361



**Figure S2.** The LD map of ZNF804A promoter region in major populations downloaded from HapMap database. The linkage disequilibrium (LD) of the tested SNPs was calculated using the  $r^2$  algorithm by the Haploview program.

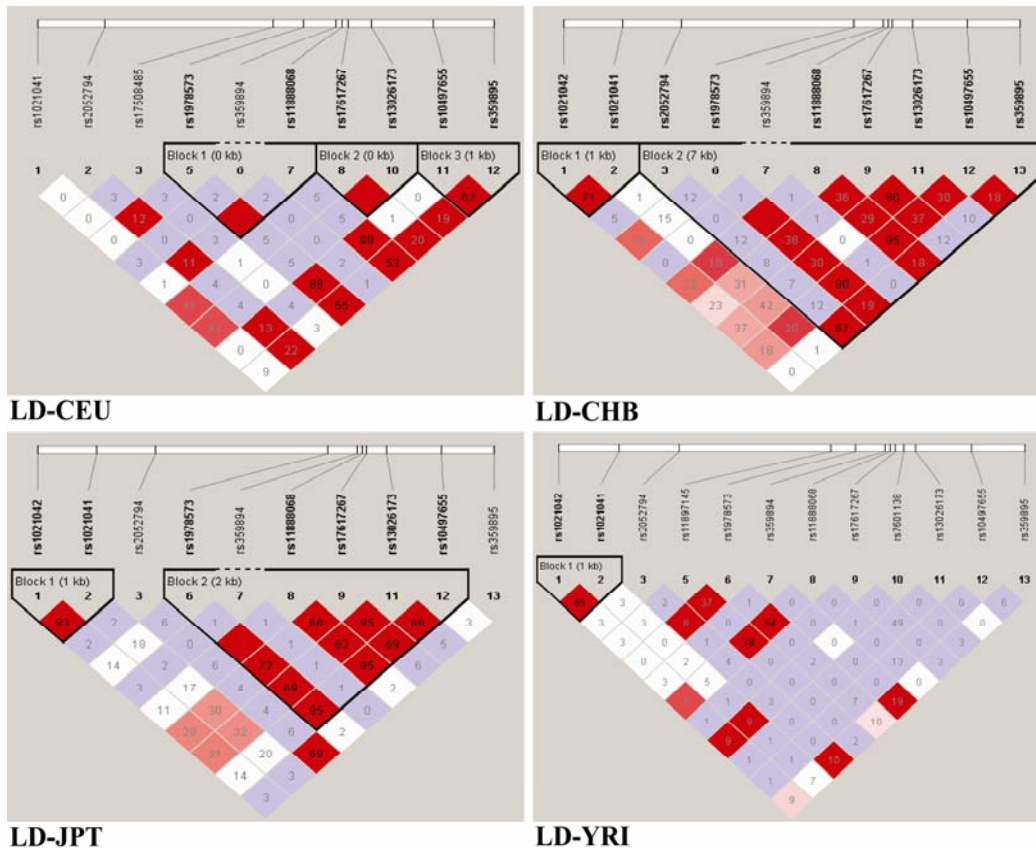

**Figure S3.** The result of population stratification analysis in Yuxi and Kunming samples. **(a)** Triangle plot for Yuxi sample. **(b)** Triangle plot for Kunming sample. red: controls; green: cases.

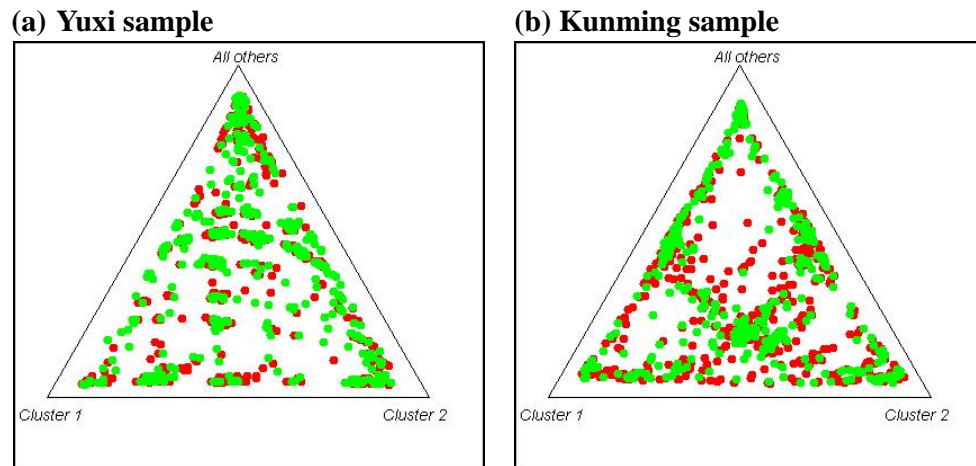

Note: To avoid false positive associations caused by population stratification, we carried out population stratification analysis in our Yuxi and Kunming samples, by using genotyping data of 24 randomly selected SNPs (Table S4), whose genotype distributions were all in Hardy-Weinberg equilibrium in our samples. The Structure software (version 2.3.3) was used. We applied admixture model and independent allelic frequency model and ran from  $K=2$  to  $K=10$ , which means the number of potential classification of tested samples, and we showed the triangle plot when  $K=3$  (Figure S3), which is the suggested number of inferring clusters for triangle plots. For all Structure runs, we set the parameters with a burn-in of 10,000 iterations and 10,000 follow-on iterations.
